# Supplementary material for: A randomized phase II study of pelareorep and docetaxel or docetaxel alone in men with metastatic castration resistant prostate cancer: CCTG study IND 209
Source: PubMed Central journal article supplement (PMC5814290; doi:10.18632/oncotarget.24263), 2018-01-17
Supplement: oncotarget-09-8155-s001.pdf [file oncotarget-09-8155-s001.pdf]

## A randomized phase II study of pelareorep and docetaxel or docetaxel alone in men with metastatic castration resistant prostate cancer: CCTG study IND 209

### SUPPLEMENTARY MATERIALS

**Supplementary Table 1: Circulating tumor cell favorable and conversion rate**

|                                          | ARM A N=41 | ARM B N=44 | P Value |
|------------------------------------------|------------|------------|---------|
| Circulating Tumor Cell (CTC)             |            |            |         |
| Baseline                                 |            |            |         |
| N                                        | 39         | 40         |         |
| Median                                   | 5          | 4.5        |         |
| Range                                    | 0-139      | 0-253      | 0.65    |
| Favorable (< 5 CTC/7.5 mL)               | 17 (41.5)  | 20 (45.5)  |         |
| Unfavorable (≥5 CTC/7.5 mL)              | 22 (53.7)  | 20 (45.5)  |         |
| Missing                                  | 2 (4.9)    | 4 (9.1)    |         |
| At 6 weeks                               |            |            |         |
| Favorable (< 5 CTC/7.5 mL)               | 23 (56.1)  | 28 (63.6)  | 0.42    |
| Unfavorable (≥5 CTC/7.5 mL)              | 11 (26.8)  | 8 (18.2)   |         |
| Missing                                  | 7 (17.1)   | 8 (18.2)   |         |
| At 12 weeks                              |            |            |         |
| Favorable (< 5 CTC/7.5 mL)               | 22 (53.7)  | 25 (56.8)  | 0.55    |
| Unfavorable (≥5 CTC/7.5 mL)              | 9 (22.0)   | 6 (13.6)   |         |
| Missing                                  | 10 (24.4)  | 13 (29.5)  |         |
| Conversion from unfavorable to favorable |            |            |         |
| At 6 weeks                               | 7 (17.1)   | 10 (22.7)  | 0.59    |
| At 12 weeks                              | 7 (17.1)   | 9 (20.5)   | 0.79    |
